# Supplementary material
Source: PubMed Central journal article supplement (PMC2889060)
Supplement: 0911535107_pnas.0911535107_SI.pdf [file 0911535107_pnas.0911535107_SI.pdf]

# Supporting Information

Toh et al. 10.1073/pnas.0911535107

## SI Text

**SI Materials and Methods. Sample preparation.** The detailed preparation of RpBphP2 and RpBphP3 bacteriophytochrome proteins and their mutants were described previously (1). For H/D exchange experiments, the proteins were dissolved in D<sub>2</sub>O buffer (20 mM Tris · HCl, pD 8 at room temperature). H/D exchange was carried out by removing the H<sub>2</sub>O buffer by using an ultracentrifuge and then adding the D<sub>2</sub>O buffer to dilute the protein concentration. These procedures were repeated for at least 6 times to minimize the content of the H<sub>2</sub>O buffer. The deuterated proteins were prepared at least 24 hours prior to the experiments. On the day of the experiments, the samples (in D<sub>2</sub>O buffer) were further diluted by adding the D<sub>2</sub>O buffer.

**Femtosecond transient absorption spectroscopy.** Femtosecond transient absorption experiments were performed by using an amplified Ti:sapphire-based laser setup. A seed pulse from a diode-pumped oscillator (Coherent Vitesse, 800 nm, 80 MHz, 100 fs) is amplified to 2.5 W by using a Nd:YLF high-power pump laser (Coherent Evolution-20, 527 nm, 1 kHz). The Ti:sapphire-based amplifier (Coherent Legend-USP) incorporates chirped pulse amplification and a stretcher/compressor combination to deliver sub-50-fs pulses, with a center wavelength at 800 nm and a bandwidth of 30 nm (FWHM) at a repetition rate of 1 kHz. The beam is guided into an optical parametric amplification setup (Coherent OpeRA), which converts the pump-laser output to a tunable pair of outputs: the signal (1,150–1,600 nm) and the idler (1,600–2,630 nm). To generate a 680-nm pump beam, the signal at 1,360 nm was frequency-doubled in a nonlinear crystal. A small fraction of the initial 800-nm beam was used to generate the white-light probe light by using a sapphire crystal. The protein solution sample was contained in a quartz flow cuvette with a 2-mm path length. A diaphragm metering pump model STEPDOS 03S from KNF Neuberger, Inc. is used to flow the fresh sample in the cuvette from an external cuvette with an ~3–4 mL sample. The external cuvette is constantly under illumination by a 750- (P2) or 650-nm LED light (P3) so that the light-activated sample is brought to the ground state before feeding into the flow cuvette. Alternatively, a 2-mm quartz cuvette is used without flowing but attached to a high frequency shaker, and with direct illumination of a 750- or 650-nm LED. The flow and shaking cuvette methods gave identical results. The sample used has an OD of about 0.2–0.4/(2 mm) at the excitation wavelength. Both the pump light of 680 nm with energy of 200–400 nJ (generated from the optical parametric amplifier, second harmonic generation) and the probe light are focused and overlapped at the sample in the cuvette. The probe light was focused on the entrance slit of a spectrograph, spectrally dispersed, and projected on a 256 diode-array detector. The spectral resolution was 1.2 nm. A reference data using water is collected by using the same experimental conditions. This reference data is used to correct artifacts caused by cross-phase modulation near time zero because of pulse interaction between the probe and the pump in the solvent and cuvette windows.

**Time-resolved fluorescence spectroscopy.** Time-resolved fluorescence measurements were carried out by using a streak camera setup described earlier (2). An integrated Ti:sapphire oscillator (Coherent Vitesse) produced pulses of 800 nm with 100 fs duration at 80 MHz repetition rate. This beam is directed into a regenerative amplifier (Coherent RegA) operating rate

between 48 and 128 kHz and then fed into an optical parametric amplifier (Coherent OPA). The OPA is able to generate excitation (pump) pulses from 470 to 720 nm. The synchronization of the camera with the frequency of the pulses is achieved through monitoring of a split of the initial 800-nm beam by using a PIN diode. The pump light is focused on a 1-cm path-length quartz cuvette that is placed on top of a magnetic stirrer. The sample with about 0.1 OD/cm is pumped by the 681-nm laser beam, with background illumination using a 750- or 645-nm LED in order to bring the light-activated sample to the ground state. The emission from the sample is collected at a right angle with respect to the pump beam and focused into the slit and grating by using an achromatic lens. A sheet polarizer is used to adjust the magic angle (54.7°, with respect to the polarization angle of the pump beam) of the collected emission. The dispersed light is converted to electrons at the photocathode and time-resolved by using a sweep circuit that varies the voltage applied to sweep electrodes. A microchannel plate is used to amplify the electron signal, and this signal is projected to a phosphor screen and then is detected by the camera. Two sets of data for one sample are collected, with a time range up to 200 ps (time range 1) and 2 ns (time range 4), at time resolutions of 5 and 21 ps, respectively.

**Data analysis.** Femtosecond transient absorption data were globally analyzed through the spectra range in the data. The global analysis gives an idea of the number of possible intermediate states that is evolving in time, in a sequential manner. This sequential model assumes increasing lifetimes in the subsequent intermediate states. The spectra estimated by the analysis are termed as evolution-associated difference spectra (EADS). EADS does not necessarily represent the right kinetic model for the system because a number of energy and charge transfer processes might be happening in parallel. Therefore, a kinetic model that includes processes happening in series and in parallel must be employed. This analysis is termed as a target analysis and is used in addition to the global analysis. The spectra produced by target analysis are termed species-associated difference spectra (SADS). In this study, we analyzed sample data in H<sub>2</sub>O and D<sub>2</sub>O simultaneously and routinely found a higher yield of the Lumi-R primary product state in D<sub>2</sub>O. To correlate the decay rate constant with the lifetime, we can utilize the formula below:

$$I(t) = I_0 e^{-t/\tau},$$

where

$$\frac{1}{\tau} = \sum_i \theta_i$$

and  $t$  is time,  $\tau$  is the lifetime of the state,  $I_0$  is the initial population of the state at  $t = 0$ , and  $\theta_i$  are the rates for each decay pathway. Details of this method and analysis can be found elsewhere (3).

In time-resolved fluorescence measurements, an independent exponential decay scheme is assumed that produces the decay-associated spectra (DAS). The DAS in time-resolved data is generally used to show the multiexponential decay of the excited states.

**Fluorescence quantum yield experiments.** Fluorescence quantum yield measurements were performed by using a commercial fluorometer with right-angle detection geometry (Jobin-Yvon). Cy5 was used as a fluorescence quantum yield standard

( $F_F = 0.27$ ). The samples were contained in a cuvette with 1-cm path length in the excitation direction and 0.4-cm path length in the detection direction. The absorbance of Bph and reference samples was adjusted to similar values of less than 0.03 per cm; fluorescence intensities were corrected for the number of absorbed photons. The excitation density was kept

low to avoid photoconversion of the Bph samples. The fluorescence spectra were corrected for the wavelength sensitivity of the detection system and converted to an energy scale, thereby correcting the change in bandpass through the relation  $I(n) = I^2(l)$  (4). The fluorescence spectra were recorded and integrated up to 850 nm.

1. Yang X, Stojkovic EA, Kuk J, Moffat K (2007) Crystal structure of the chromophore binding domain of an unusual bacteriophytochrome, RpBphP3, reveals residues that modulate photoconversion. *Proc Natl Acad Sci USA* 104:12571–12576.
2. Gobets B, et al. (2001) Time-resolved fluorescence emission measurements of photosystem I particles of various cyanobacteria: A unified compartmental model. *Biophys J* 81:407–424.
3. van Stokkum IHM, Larsen DS, van Grondelle R (2004) Global and target analysis of time-resolved spectra. *Biochim Biophys Acta (Bioenerg)* 1657:82–104.
4. Lakowicz JR (2006) *The Principles of Fluorescence Spectroscopy* (Plenum Press, New York).







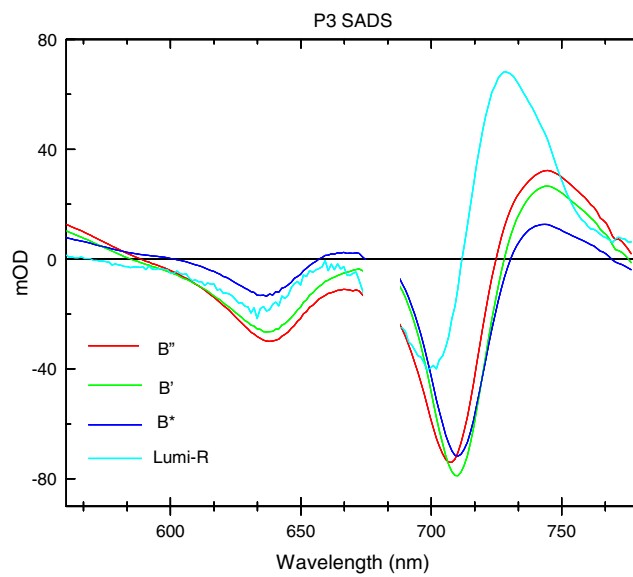

**Fig. S3.** Target analysis of *R. palustris* P3. SADS that result from the target analysis by simultaneously analyzing the P3 data dissolved in H<sub>2</sub>O and D<sub>2</sub>O.











**Table S1. Rates estimated from a target analysis of the time-resolved data of P3 (upper) and P2 (lower) by using the kinetic schemes shown in Fig. 3 (P3) and Fig. S8A (P2).**

| P3 target analysis |                                        |       |                                        |       |      |
|--------------------|----------------------------------------|-------|----------------------------------------|-------|------|
|                    | H <sub>2</sub> O                       |       | D <sub>2</sub> O                       |       | KIE  |
|                    | ps <sup>-1</sup>                       | ps    | ps <sup>-1</sup>                       | ps    |      |
| k <sub>1</sub>     | 0.29                                   | 3.4   | 0.26                                   | 3.9   | 1.15 |
| k <sub>2</sub>     | 2.4 × 10 <sup>-2</sup>                 | 42    | 1.89 × 10 <sup>-2</sup>                | 53    | 1.26 |
| k <sub>3</sub>     | 1.9 × 10 <sup>-4</sup>                 | 5,400 | 1.7 × 10 <sup>-4</sup>                 | 5,800 | 1.08 |
| k <sub>4</sub>     | 2.9 × 10 <sup>-3</sup>                 | 350   | 1.95 × 10 <sup>-3</sup>                | 500   | 1.43 |
| k <sub>R</sub>     | 1.5 × 10 <sup>-4</sup>                 | 6,600 | 1.5 × 10 <sup>-4</sup>                 | 6,600 | N/A* |
| P2 target analysis |                                        |       |                                        |       |      |
|                    | H <sub>2</sub> O Φ <sub>1</sub> = 0.61 |       | D <sub>2</sub> O Φ <sub>1</sub> = 0.61 |       | KIE  |
|                    | ps <sup>-1</sup>                       | ps    | ps <sup>-1</sup>                       | ps    |      |
| k <sub>1</sub>     | 3.0                                    | 0.3   | 3.0                                    | 0.3   | 1    |
| k <sub>2</sub>     | 0.244                                  | 4.1   | 0.244                                  | 4.1   | 1    |
| k <sub>3</sub>     | 4.6 × 10 <sup>-3</sup>                 | 220   | 3.9 × 10 <sup>-3</sup>                 | 259   | 1.18 |
| k <sub>4</sub>     | 1.93 × 10 <sup>-2</sup>                | 52    | 1.63 × 10 <sup>-2</sup>                | 61    | 1.18 |
| k <sub>5</sub>     | 5.2 × 10 <sup>-4</sup>                 | 1,900 | 5.2 × 10 <sup>-4</sup>                 | 1,900 | 1    |
| k <sub>6</sub>     | 5.5 × 10 <sup>-3</sup>                 | 180   | 3.8 × 10 <sup>-2</sup>                 | 262   | 1.45 |
| k <sub>R</sub>     | 1.5 × 10 <sup>-4</sup>                 | 6,600 | 1.5 × 10 <sup>-4</sup>                 | 6,600 | N/A* |

\*Not applicable.
